# Supplementary material for: Exploring Sentence Diversity at the Boundary of Typical and Impaired Language Abilities
Source: J Speech Lang Hear Res. 2020 Oct 15;63(10):3236–51. doi: 10.1044/2020_JSLHR-20-00031 (PMC8062155; doi:10.1044/2020_JSLHR-20-00031)
Supplement: Supplemental Material S1 [file JSLHR-63-3236-s001.xlsx]

## Sheet: Generated Word List 3P Trans Su
Supplemental material, Hadley, "Exploring Sentence Diversity at the Boundary of Typical and Impaired Language Abilities," JSLHR, https://doi.org/10.1044/2020_JSLHR-20-00031
Supplemental Material S1. Verbs by subject type.
36 Months, with I Subjects				36 Months, with 3rd Person Pronoun Subjects				36 Months, with Noun Subjects				Pronoun/Noun Combined
TRANSITIVE	Child	Occurrences		INTRANSITIVE	Children	Occurrences		INTRANSITIVE	Children	Occurrences		INTRANSITIVE	Children
WANT	15	58		GO	15	110		GO	16	57		GO	18
GET (obtain)	14	33		COME	10	29		COME	9	15		COME	12
PUT	13	32		FALL	9	14		FALL	5	8		FALL	11
DO	12	26		FIT	7	19		FIT	4	5		FIT	11
NEED	12	36		RAIN	6	12		BREAK	2	2
GOT (have)	10	13		GET (become)	5	7		GET (become)	2	6
FIND	8	12		POP	5	12		PLAY	2	2
SEE	7	7		WORK	4	5		SIT	2	2
HAVE	6	10		CRY	3	14		EAT	1	1
MAKE	6	17		EAT	3	5		FEEL	1	1
LIKE	5	6		HURT	3	3		HURT	1	4
PUSH	5	10		STAY	3	3		POP	1	1
WASH	5	9		DRIVE	2	2		RUN	1	2
POP	4	5		FLY	2	4		SLEEP	1	1
BLOW	3	5		LOOK	2	2		STAY	1	1
CATCH	3	5		SIT	2	2		STICK	1	1
DROP	3	4		SLEEP	2	2		TALK	1	1
EAT	3	4		STAND	2	2		WAKE	1	1
HIDE	3	3		SWING	2	2		WASH	1	1
TAKE	3	4		CRASH	1	1		WORK	1	1
BRUSH	2	2		DRAW	1	9
FIX	2	2		DUMP	1	1
HEAR	2	2		HANG	1	1
HOLD	2	2		HAPPEN	1	1
KNOCK	2	9		LAUGH	1	1
KNOW	2	5		MATCH	1	1
OPEN	2	2		ORDER	1	3
SHUT	2	2		PLAY	1	1
TIE	2	2		REACH	1	1
BITE	1	1		REST	1	1
BREAK	1	2		RIDE	1	1
BUILD	1	1		ROAR	1	1
BUY	1	2		SHUT	1	1
CARRY	1	1		SMELL	1	2
CHANGE	1	1		SPILL	1	1
CLOSE	1	1		STICK	1	1
COVER	1	1		TALK	1	1
CRASH	1	1		TICKLE	1	1
DRINK	1	3		TIE	1	1
DRIVE	1	2
GO	1	1
HIT	1	1
HURT	1	1
KICK	1	1
LOSE	1	1
MESS	1	1
PLAY	1	1
PULL	1	1
SAY	1	1
SHOW	1	1
STOP	1	1
SWING	1	1
THROW	1	1
ZIP	1	1
